# Supplementary material for: A MXene-derived tetrathiafulvalene metal–organic framework for ultra-long supercapattery
Source: Royal Society of Chemistry journal article supplement (doi:10.1039/d5ta06224a), 2025-01-01
Supplement: d5ta06224a1.pdf [file d5ta06224a1.pdf]

## **Supporting Information**

### **MXene-Derived Tetrathiafulvalene Metal-Organic Framework for Ultra-Long Supercapattery**

*Nasrin Kabeer<sup>a</sup>, Yusuf Khan<sup>b, c</sup>, Mostafa Zeama<sup>a</sup>, Jehad K. El-Demellawi<sup>b</sup>, Anita Justin<sup>a</sup>, Sharath Kandambeth<sup>a</sup>, Vinayak S. Kale<sup>a</sup>, Osama Shekhah<sup>a</sup>, Husam N. Alshareef<sup>\*b,c</sup> and Mohamed Eddaoudi<sup>\*a</sup>*

*<sup>a</sup> Functional Materials Design, Discovery and Development Research Group (FMD3), Division of Physical Science and Engineering (PSE), King Abdullah University of Science and Technology (KAUST), Thuwal 23955-6900, Kingdom of Saudi Arabia*

*<sup>b</sup> Center for Renewable Energy and Storage Technologies (CREST), King Abdullah University of Science and Technology, Thuwal, 23955-6900, Saudi Arabia*

*<sup>c</sup> Materials Science and Engineering, Division of Physical Science and Engineering (PSE), King Abdullah University of Science and Technology (KAUST), Thuwal, 23955–6900, Saudi Arabia.*

### **Table of Contents**

|            |                                     |       |
|------------|-------------------------------------|-------|
| Section S1 | Electrochemical calculations        | S2-S3 |
| Section S2 | Material Characterizations          | S3-S6 |
| Section S3 | Electrochemical Characterization    | S6-S8 |
| Section S4 | Electrochemical Performances tables | S8-S9 |
| Section S5 | References                          | S9    |

## S1: Electrochemical calculations

The BioLogic SP-300 Modular Research Grade Potentiostat/Galvanostat/FRA electrochemical workstation was used to test the electrochemical performance of synthesized MOFs and assembled supercapattery using the cyclic voltammetry (CV), galvanostatic charge discharge (CD), and electrochemical impedance spectroscopy (EIS) techniques. The active materials  $V_2CT_x$ -TMOF/ $VOSO_4$ -TMOF/activated carbon were combined with PVDF binder and super-P carbon as a conducting agent in a weight ratio of 75:20:5 to create the working electrode. The *N*-Methyl-2-pyrrolidone (NMP) solvent was used to make a paste for this electrode material, which was then applied to a 2 x 4 cm<sup>2</sup> nickel foam substrate. The electrode materials were loaded at around 3 mg/cm<sup>2</sup>, and the coated substrate was vacuum oven dried at 50 °C overnight. Hg/HgO and Pt foil were used as a reference electrode and a counter-electrode, respectively. For all the electrochemical analysis, 3 M KOH was used as an electrolyte. The CV and CD experiments were carried out at different scan rates and various current densities, respectively.<sup>1,2</sup>

The specific capacity can be calculated using the following equation:

$$Q_{sp} = \frac{I \Delta t}{m} \quad (1)$$

where  $Q_{sp}$  is the specific capacity (C/g),  $I$  is the charge-discharge current (A),  $\Delta t$  is the total discharge time (sec), and  $m$  is the total active mass of the electrode material (g). For specific capacitance in F/g

$$Q_{sc} = \frac{I \Delta t}{m \Delta v} \quad (2)$$

Total capacitance of the device is calculated using,

$$Q_t = \frac{I \times \Delta t}{M} \quad (3)$$

$$Q_{SP} = 4 \times Q_t \quad (4)$$

Here,  $Q_t$  is the total specific capacity of the fabricated device (C/g),  $Q_{sp}$  is the specific capacity of the electrode material (C/g),  $I$  is the discharge current (A/g),  $\Delta t$  is the discharge time (sec), and  $M$  is the total active mass of both electrodes (g). The specific energy and specific power of the device were calculated from the discharge profile using the following formula

$$E = \frac{1}{2} Q_t V \quad (5)$$

$$P = \frac{E}{\Delta t} \quad (6)$$

$E$  is the specific energy (Wh/kg), and  $P$  is the specific power (W/kg) based on the total mass of the positive and negative electrode materials. The EIS experiments were performed with 0 V bias and a sinusoidal signal of 5 mV, with a frequency range of 10 mHz to 100 kHz. EIS data were analyzed using a Nyquist plot.

## S2: Material characterization

**Figure S1:** XRD profiles of commercially available  $V_2AlC$  MAX phase and etched  $V_2CT_x$  MXene

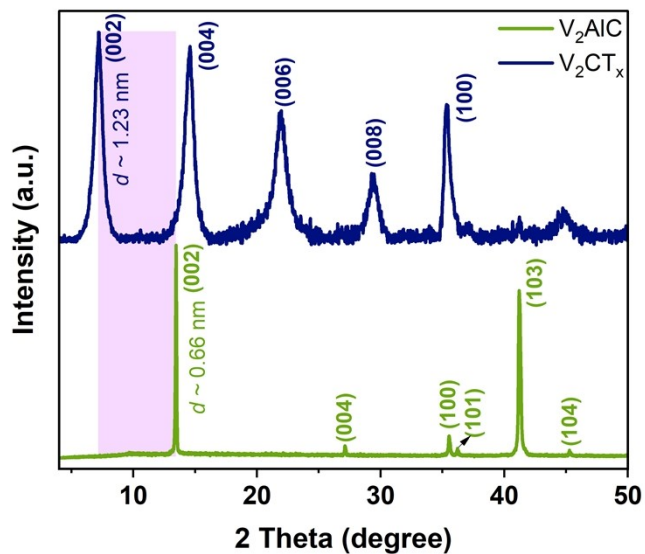

**Figure S2:** SEM images of etched  $V_2CT_x$  MXene.

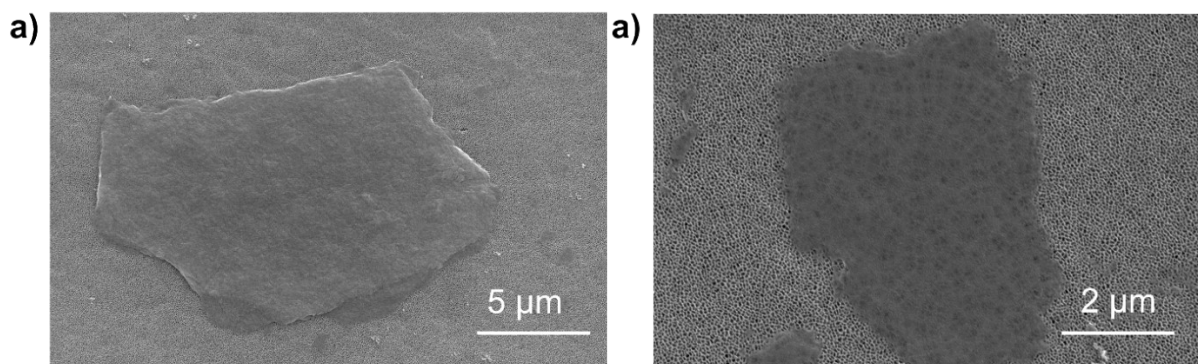

**Figure S3:** Pore size distribution curve of  $V_2CT_x$ -TMOF.

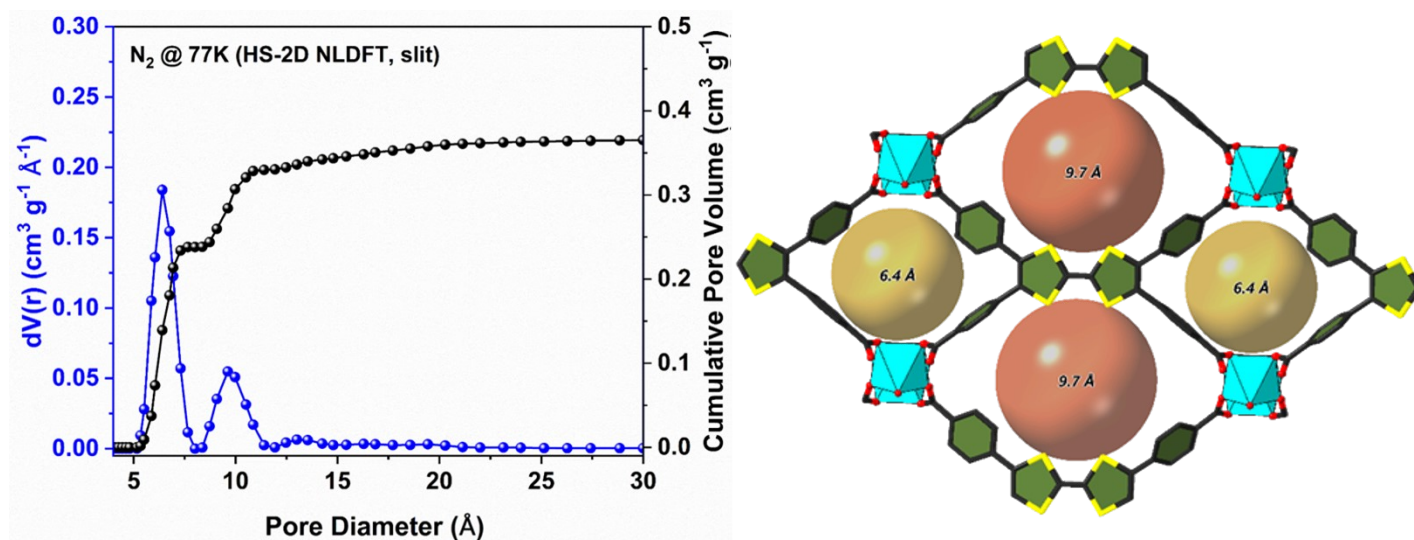

**Figure S4:**  $N_2$  adsorption-desorption isotherm of  $VOSO_4$ -TMOF MXene.

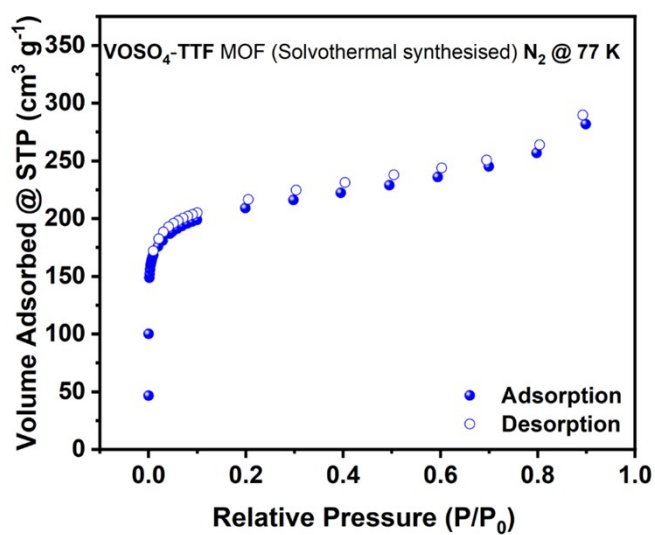

**Figure S5:** XRD images of  $V_2CT_x$ -TMOF before and after  $N_2$  sorption analysis

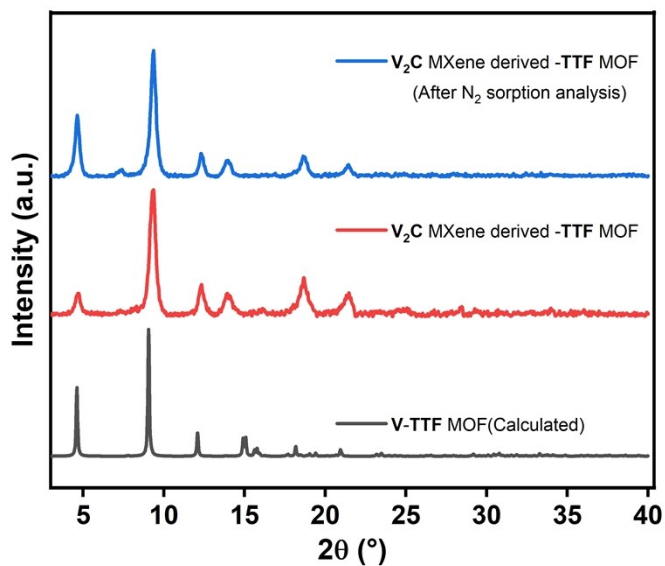

**Figure S6:** TGA curves of solvothermal synthesized  $VOSO_4$ -TMOF and MXene derived  $V_2CT_x$ -TMOF.

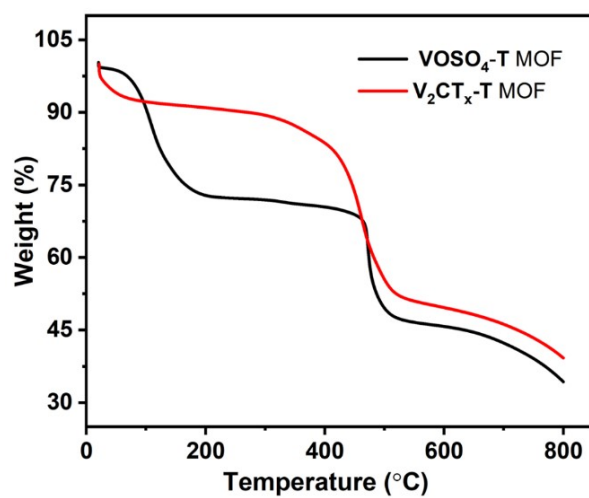

**Figure S7:** SEM images of solvothermal synthesized  $VOSO_4$ -TMOF

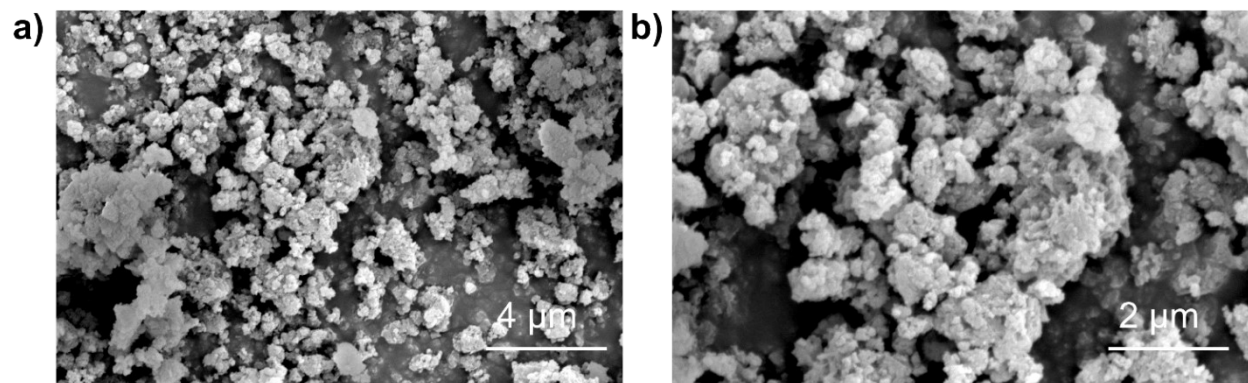

### S3: Electrochemical characterization

**Figure S8:** CV, GCD curves of a, c)  $V_2CT_x$ -TMOF, b, d) Activated carbon at different scan rates and current densities

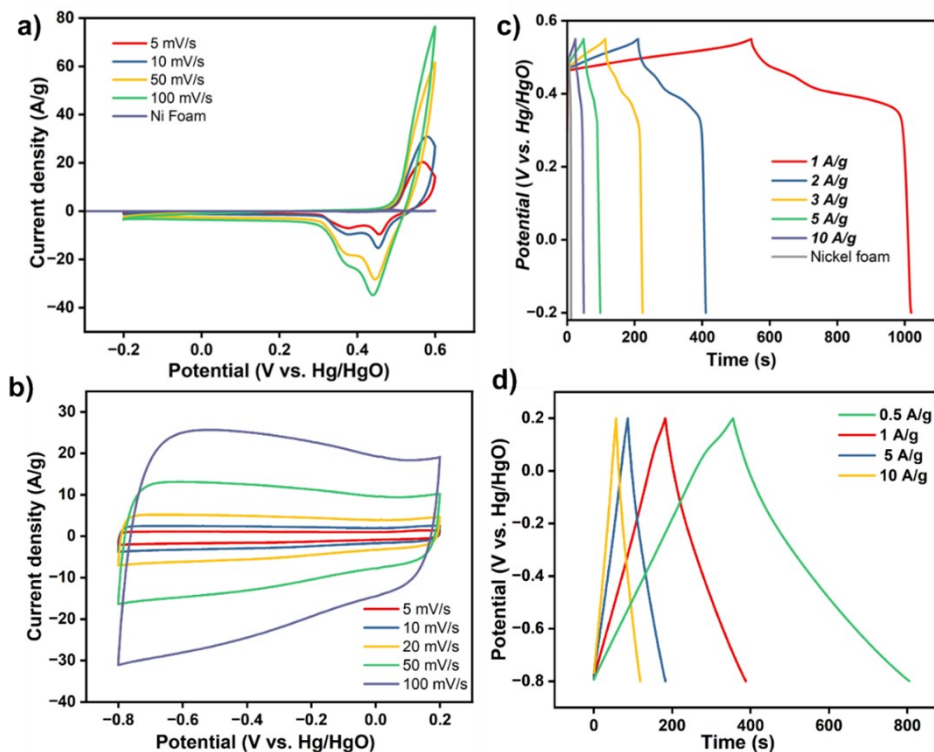

**Figure S9:** CV curves of  $V_2CT_x$ -TMOF//AC supercapattery device a) device design b) device tested in different potential differences at scan rate of 5 mV/s

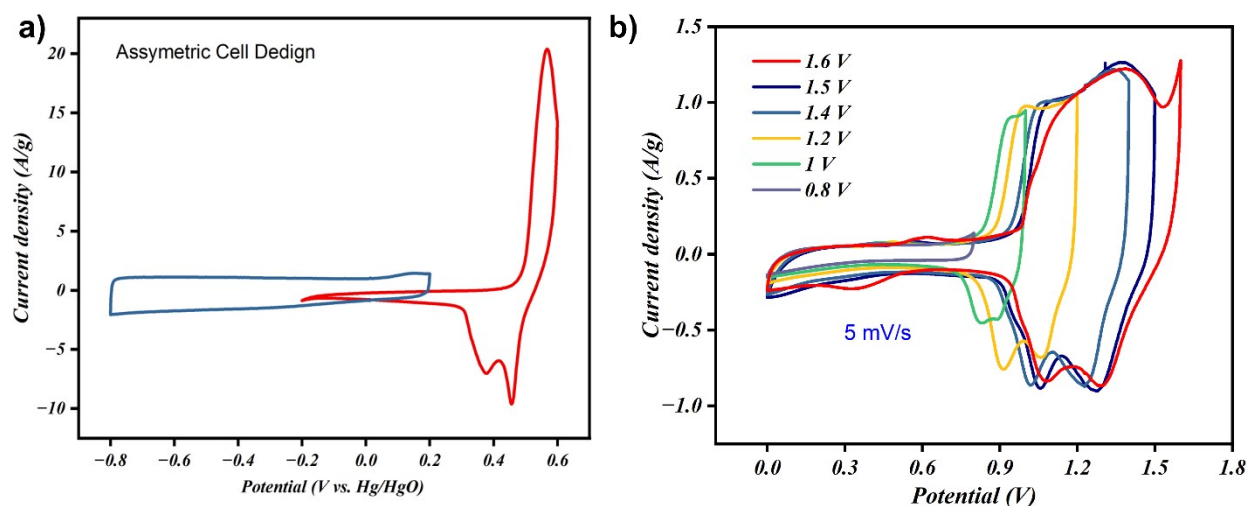

**Figure S10:** 7 set GCD profile of  $V_2CT_x$ -TMOF//AC supercapattery device during the initial cycles and final cycles when reaching 30,000 cycles.

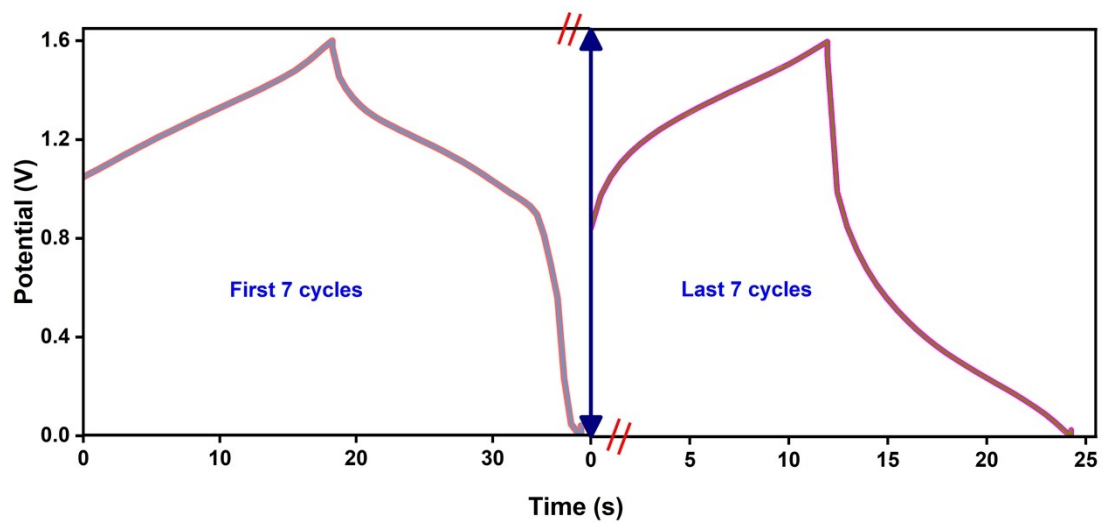



### **S4: Electrochemical performance tables**

**Table S1:** Three electrode capacitance (single electrode measurements) comparison for V<sub>2</sub>CT<sub>x</sub>-TMOF, VOSO<sub>4</sub>-TMOF, and AC carbon.

| <b>V<sub>2</sub>CT<sub>x</sub>-TMOF</b> |                   |                      | <b>VOSO<sub>4</sub>-TMOF</b> |                   |                      | <b>AC CARBON</b> |                   |                      |
|-----------------------------------------|-------------------|----------------------|------------------------------|-------------------|----------------------|------------------|-------------------|----------------------|
| Current density                         | Specific capacity | Specific Capacitance | Current density              | Specific capacity | Specific Capacitance | Current density  | Specific capacity | Specific Capacitance |
| 1 A/g                                   | 480 C/g           | 640 F/g              | 1 A/g                        | 395 C/g           | 526 F/g              | 0.5 A/g          | 225 C/g           | 225 F/g              |
| 2 A/g                                   | 414 C/g           | 552 F/g              | 2 A/g                        | 360 C/g           | 480 F/g              | 1 A/g            | 212 C/g           | 212 F/g              |
| 3 A/g                                   | 348 C/g           | 464 F/g              | 5 A/g                        | 320 C/g           | 426 F/g              | 5 A/g            | 180 C/g           | 180 F/g              |
| 10 A/g                                  | 310 C/g           | 413 F/g              | 10 A/g                       | 279 C/g           | 372 F/g              | 10 A/g           | 165 C/g           | 165 F/g              |

**Table S2:** V<sub>2</sub>CT<sub>x</sub>-TMOF//AC hybrid supercapattery device (Full cell device) performance, indicating specific energy and specific power with device capacitance

| Current Density | Total Capacity | Total Capacitance | Specific capacitance | Specific Capacity | Specific Energy | Specific Power |
|-----------------|----------------|-------------------|----------------------|-------------------|-----------------|----------------|
| 1 A/g           | 222 C/g        | 138 F/g           | 552 F/g              | 888 C/g           | 50 Wh/kg        | 1264 W/kg      |
| 2 A/g           | 185 C/g        | 116 F/g           | 464 F/g              | 740 C/g           | 42 Wh/kg        | 1596 W/kg      |
| 3 A/g           | 170 C/g        | 106 F/g           | 424 F/g              | 680 C/g           | 38 Wh/kg        | 1753 W/kg      |
| 5 A/g           | 144 C/g        | 90 F/g            | 360 F/g              | 560 C/g           | 32 Wh/kg        | 2504 W/kg      |

### **S5: References**

- 1 K. Nasrin, K. Subramani, M. Karnan and M. Sathish, *J. Colloid Interface Sci*, 2021, **600**, 264–277.
- 2 K. Choi, I. K. Moon and J. Oh, *J. Mater. Chem. A*, 2019, **7**, 1468–1478.
